# Supplementary material for: TRPC6 Deletion Enhances eNOS Expression and Reduces LPS—Induced Acute Lung Injury
Source: MDPI journal article supplement (doi:10.3390/ijms242316756), 2023-11-25
Supplement: s1 [file s1]

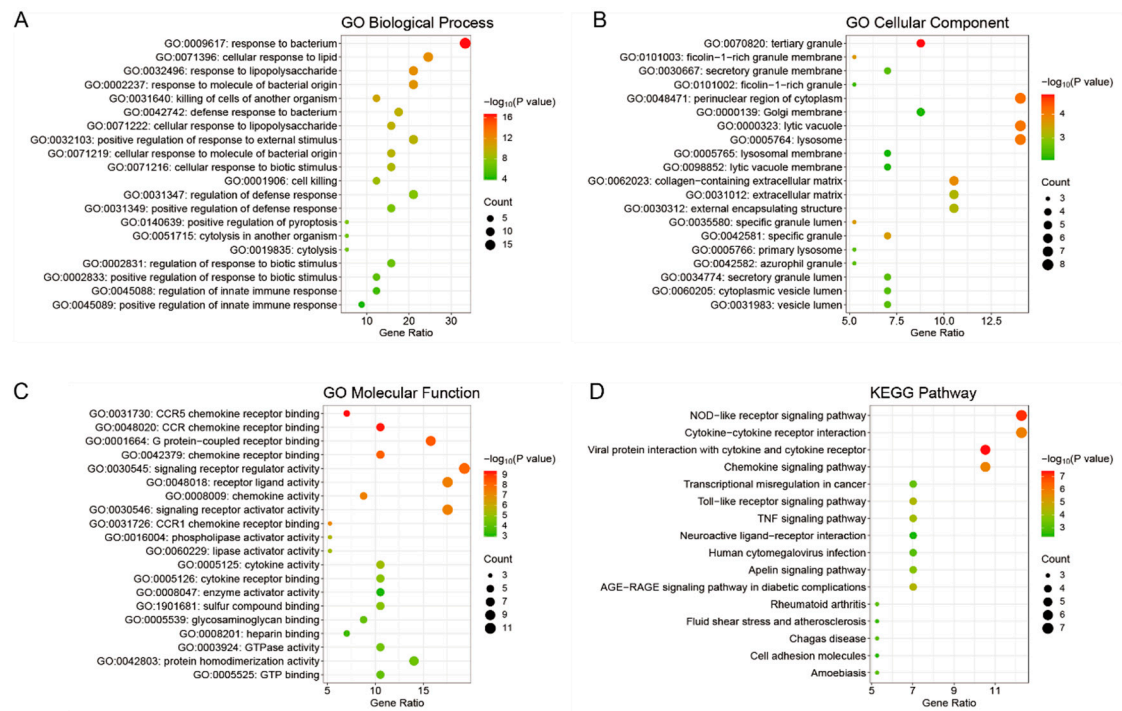

**Figure S1.** Enrichment Analysis Results. (A) GO Biological Processes analysis results for differentially expressed genes in WT-LPS vs WT-PBS. (B) GO Cellular Components analysis results for differentially expressed genes in WT-LPS vs WT-PBS. (C) GO Molecular Functions analysis results for differentially expressed genes in WT-LPS vs WT-PBS. (D) KEGG Pathway enrichment analysis results for differentially expressed genes in WT-LPS vs WT-PBS.

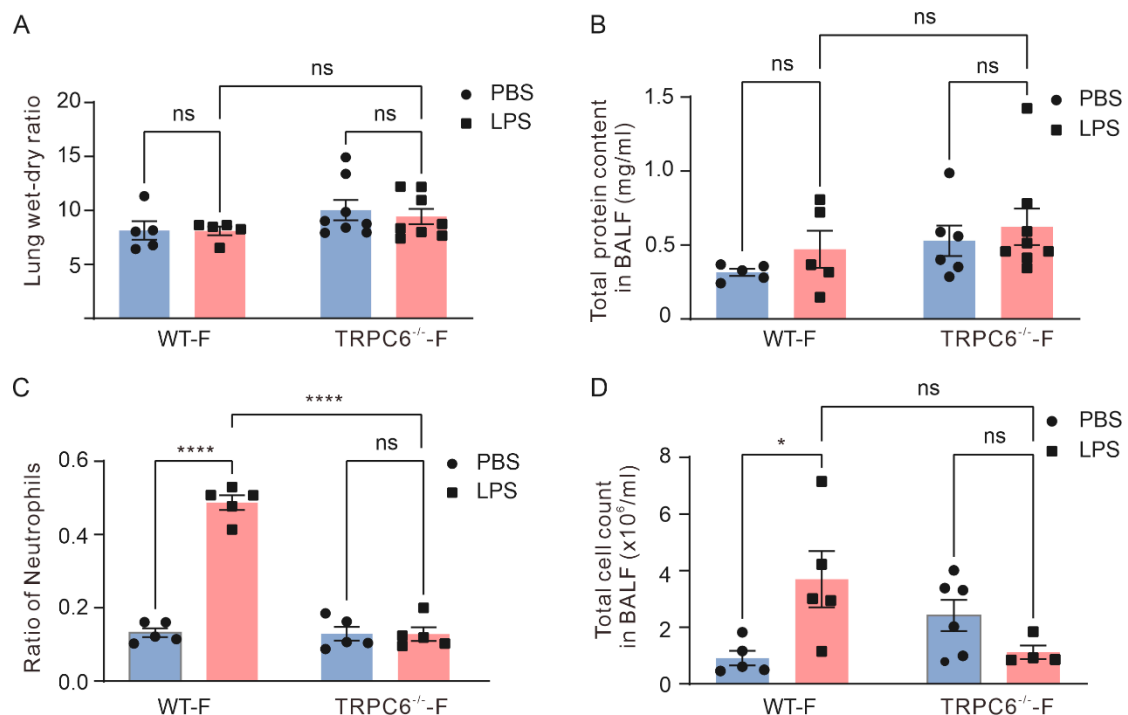

**Figure S2.** The impact of TRPC6 deletion on lung injury in female mice induced by ALI was assessed through measurements of lung wet-to-dry weight ratio (A), total protein content (B), neutrophil count ratio (C), and total cell count (D) in BALF. The data are presented as mean  $\pm$  SEM, with statistical significance denoted as \* $P < 0.05$ ; \*\* $P < 0.01$ ; \*\*\* $P < 0.001$ ; \*\*\*\* $P < 0.0001$ .
